# Supplementary material
Source: Research Square preprint supplement (doi:10.21203/rs.3.rs-6125811/v1)
Supplement: Supplementary file 1 [file 050a0ce9e544fb3ec5a5c748.docx]

**Nanocomposite Biosensor Tracks Honokiol-Induced Oxidative Stress Dynamics in 3D Hydrogel-Cultured Lung Cancer Cells**

Yuxuan Zhu1,2, Zhichao Huang1, Shichao Tian1, Qi Wang4, Fan Wu1, Jingwen Liu5, Ping Wang1,3, Hao Wan1,3*,Liujing Zhuang1,2*, Deming Jiang1,3*

1Biosensor National Special Laboratory, Key Laboratory for Biomedical Engineering of Education Ministry, Department of Biomedical Engineering, Zhejiang University, Hangzhou 310027, China.

2State Key Laboratory of Transducer Technology, Chinese Academy of Sciences, Shanghai, 200050, China;

3Cancer Center, Binjiang Institute of Zhejiang University, Hangzhou 310027, China

4Center of Clinical Big Data and Analytics of the Second Affiliated Hospital and School of Public Health, Zhejiang University School of Medicine, Hangzhou, 310058, China

5Department of Gastroenterology, the Second Affiliated Hospital, School of Medicine, Zhejiang University, Hangzhou 310009, China;

*Corresponding authors:

Deming Jiang ([*gemnjiang@zju.edu.cn*](mailto:gemnjiang@zju.edu.cn));

Liujing Zhuang ([*zhuangliujing@zju.edu.cn*](mailto:zhuangliujing@zju.edu.cn));

Hao Wan (*wh1816@zju.edu.cn*)


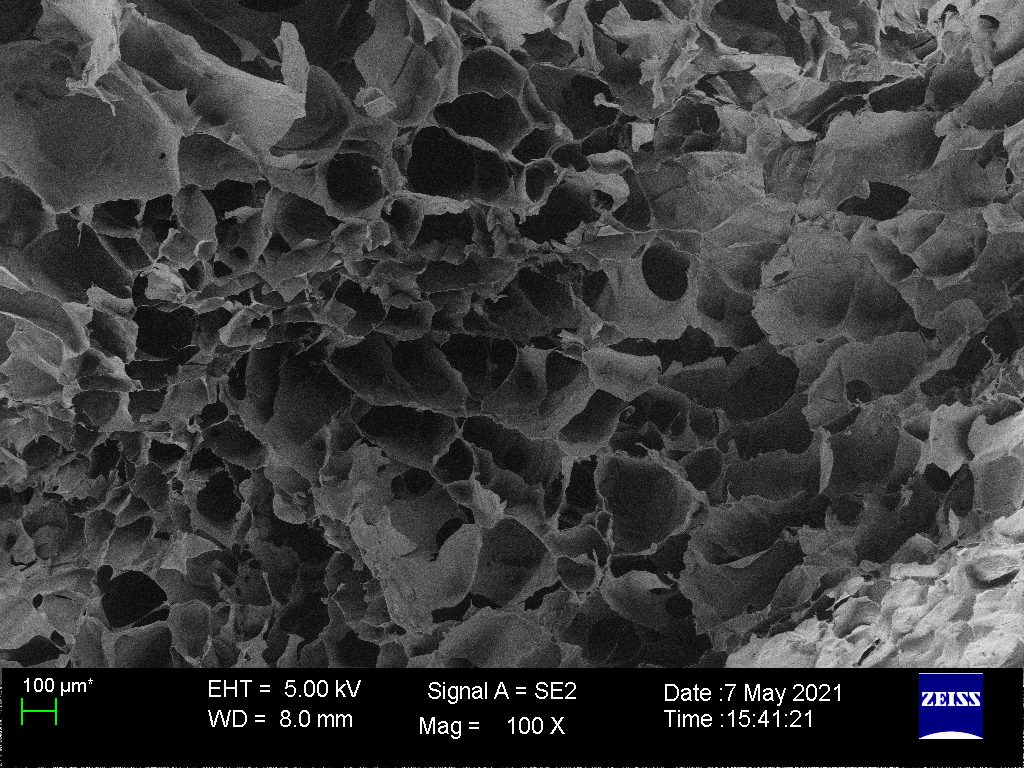


**Figure S1**. Scanning electron microscopy images of the surface topography of GelMA hydrogel.


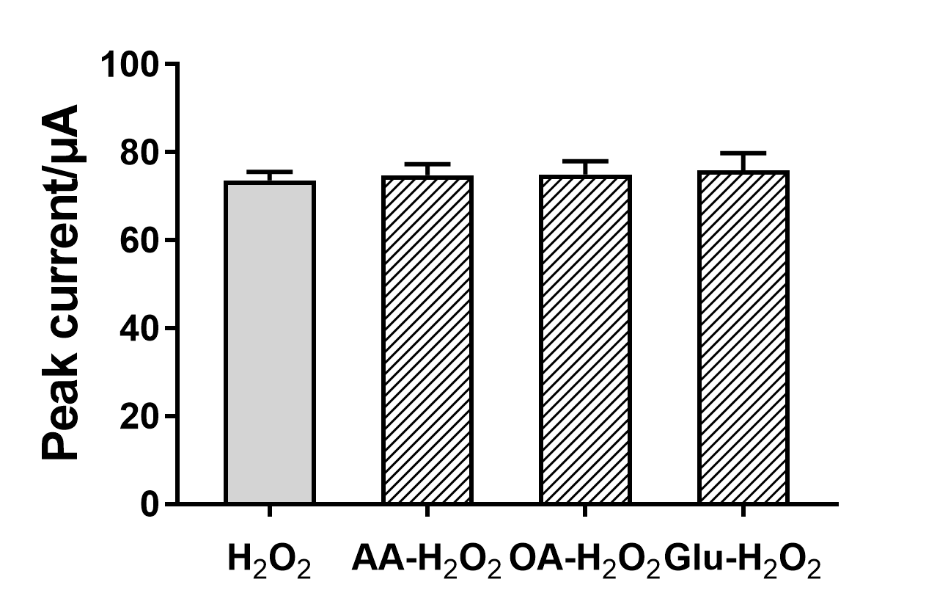


**Figure S2**. The detection of H2O2 with the interference of AA, OA and Glu. The concentration of H2O2 was (100 μM) in blank control, the interference of AA (100 μM), OA (100 μM) and Glu (100 μM) was under the detection of H2O2 (100 μM).
